# Supplementary material for: 2D Layered non-precious metal mesoporous electrocatalysts for enhanced oxygen reduction reaction
Source: Royal Society of Chemistry journal article supplement (doi:10.1039/c6ta10261a), 2017-01-01
Supplement: c6ta10261a1.pdf [file c6ta10261a1.pdf]

## **2D Layered Non-precious Metal Mesoporous Electrocatalysts for Enhanced Oxygen Reduction Reaction**

Lili Huo,<sup>a,b</sup> Baocang Liu,<sup>a,b</sup> Geng Zhang,<sup>a,b</sup> Rui Si,<sup>c</sup> Jian Liu,<sup>d</sup> and Jun Zhang\*<sup>a,b</sup>

<sup>a</sup> College of Chemistry and Chemical Engineering, Inner Mongolia University, Hohhot 010021,  
P. R.China

<sup>b</sup> Inner Mongolia Key Lab of Nanoscience and Nanotechnology, Inner Mongolia University,  
Hohhot 010021, P. R. China

<sup>c</sup> Shanghai Institute of Applied Physics, Chinese Academy of Sciences, Shanghai 201800, P. R.  
China

<sup>d</sup> Department of Chemical Engineering, Curtin University, Perth, Western Australia 6102,  
Australia

---

\*Corresponding author: Prof. Jun Zhang; Tel: 0086 471 4995400; Fax: 0086 471 4995400;

Email:cejzhang@imu.edu.cn

**Table S1.** N<sub>2</sub> adsorption/desorption data of meso-M–N–C/N–G nanocomposites.

| Nanocomposites  | $S_{BET}$<br>(m <sup>2</sup> ·g <sup>-1</sup> ) | $V_p^{[a]}$<br>(cm <sup>3</sup> ·g <sup>-1</sup> ) | $D_p^{[b]}$<br>(nm) |
|-----------------|-------------------------------------------------|----------------------------------------------------|---------------------|
| Meso-Fe–N–C/N–G | 776                                             | 1.31                                               | 3.9/6.4             |
| Meso-Co–N–C/N–G | 468                                             | 0.83                                               | 3.6                 |
| Meso-Ni–N–C/N–G | 436                                             | 0.81                                               | 3.6                 |

[a] BJH desorption cumulative volume of pores between 1.70 nm and 300.0 nm diameter.

[b] Calculated by the BJH method from the desorption isotherm linear plot.

**Table S2.** Summary of N and Fe contents in N–G, meso-Fe–N–C, and meso-Fe–N–C/N–G nanocomposites obtained by calcining at 700, 800, 900, and 1000 °C.

| N and Fe contents<br>(at.%)               | N–G  | Meso-Fe–N–C | Meso-Fe–N–C/N–G<br>(700 °C) | Meso-Fe–N–C/N–G<br>(800 °C) | Meso-Fe–N–C/N–G<br>(900 °C) | Meso-Fe–N–C/N–G<br>(1000 °C) |
|-------------------------------------------|------|-------------|-----------------------------|-----------------------------|-----------------------------|------------------------------|
| Ammonia N                                 | 0.29 | —           | —                           | —                           | —                           | —                            |
| Pyridinic N                               | 2.60 | 1.52        | 1.61                        | 1.08                        | 0.74                        | 0.68                         |
| Pyrrolic N                                | 0.56 | 0.29        | 0.80                        | 0.65                        | 0.22                        | 0.27                         |
| Graphitic N                               | 0.60 | 1.32        | 1.75                        | 1.32                        | 1.50                        | 1.34                         |
| Quaternary N <sup>+</sup> –O <sup>-</sup> | —    | —           | 0.46                        | 0.30                        | 0.09                        | 0.07                         |
| Total N                                   | 4.05 | 3.13        | 4.62                        | 3.35                        | 2.55                        | 2.36                         |
| Fe                                        | —    | 0.10        | 0.22                        | 0.14                        | 0.12                        | 0.09                         |

**Table S3.** Summary of Fe and N contents in meso-Co–N–C, meso-Ni–N–C/N–G, and meso-Fe–N–C/N–G nanocomposites synthesized with different Fe/N molar ratios.

| N and Fe contents<br>(at.%)               | Meso-Co–N–C/N–G | Meso-Co–N–C/N–G | Meso-Fe–N–C/N–G<br>Fe/N = 3:1 | Meso-Fe–N–C/N–G<br>Fe/N = 2:1 | Meso-Fe–N–C/N–G<br>Fe/N = 1:2 |
|-------------------------------------------|-----------------|-----------------|-------------------------------|-------------------------------|-------------------------------|
| Pyridinic N                               | 1.08            | 1.53            | 0.54                          | 0.45                          | 0.62                          |
| Pyrrolic N                                | 0.51            | 0.47            | 0.20                          | 0.47                          | 0.53                          |
| Graphitic N                               | 1.37            | 2.04            | 0.86                          | 0.88                          | 1.53                          |
| Quaternary N <sup>+</sup> –O <sup>-</sup> | 0.21            | 0.49            | 0.16                          | 0.27                          | 0.24                          |
| Total N                                   | 3.17            | 4.53            | 1.76                          | 2.07                          | 2.92                          |
| Fe                                        | —               | —               | 4.15                          | 1.12                          | 0.04                          |

**Table S4.** Summary of the ORR catalytic activity of meso-Fe–N–C/N–G nanocomposites and relevant leading transition metal/carbon-based ORR catalysts reported in recent literatures measured in 0.1 M KOH with the electrode rotating speed at 1600 rpm.

| Catalysts                    | Onset potential (V. vs RHE) | Half-wave potential (V. vs RHE) | Diffusion-limiting current at 0.5 V (mA·cm <sup>-2</sup> ) | Electron transfer number | Durability/Remarks                                                                | Reference |
|------------------------------|-----------------------------|---------------------------------|------------------------------------------------------------|--------------------------|-----------------------------------------------------------------------------------|-----------|
| Meso-Fe–N–C/N–G              | 1.03                        | 0.89                            | 5.41                                                       | 3.99-4.13                | 95.3% retention of j under 0.5 V for 2.8 h                                        | This work |
| Meso-Co–N–C/N–G              | 0.97                        | 0.84                            | 5.11                                                       | 4.02-4.19                | No available                                                                      | This work |
| Fe-N/MC                      | 0.99                        | 0.86                            | 4.80                                                       | 3.7-3.8                  | 90% retention of j under 0.7 V for 2.8 h                                          | 1         |
| FePhen@MOF-ArNH <sub>3</sub> | 1.02                        | 0.86                            | 5.2                                                        | -                        | 9mV penalty of E <sub>1/2</sub> after 1000 cycles                                 | 2         |
| Fe@C-FeNC                    | 1.03                        | 0.899                           | 5.3                                                        | 4.0                      | No available                                                                      | 3         |
| Fe-NG                        | 1.025                       | 0.837                           | 6.5                                                        | 3.8-4.0                  | 90% retention of j under 0.7 V for 8.3 h                                          | 4         |
| S-Fe/N/C                     | 0.911                       | 0.799                           | 4.7                                                        | 3.95                     | 98.3% retention of j under 0.8V for 5.5 h                                         | 5         |
| Fe/N/G                       | 1.04                        | 0.86                            | 5.1                                                        | 3.89-4.0                 | No available                                                                      | 6         |
| Fe-N/C-900                   | 1.02                        | 0.85                            | 5.43                                                       | 4.02                     | 95.3% retention of j under 0.5 V for 2.8 h                                        | 7         |
| Fe-NMCSs                     | 1.027                       | 0.86                            | 5.3                                                        | 4.05                     | 95.3% retention of j under 0.55 V for 6.9 h                                       | 8         |
| Fe-N-C(f)                    | 0.97                        | 0.85                            | 5.6                                                        | 3.5-4.0                  | No available                                                                      | 9         |
| Fe <sub>3</sub> C/Fe-N-C     | 0.98                        | 0.82                            | 5.0                                                        | -                        | No available                                                                      | 10        |
| Fe/Fe <sub>3</sub> C/N/C     | 0.98                        | 0.87                            | 6.03                                                       | 3.7-3.85                 | 62% retention of j under 0.81 V for 5.6 h                                         | 11        |
| Fe/N <sub>x</sub> /C         | 1.05                        | 0.87                            | 6.15                                                       | 3.9                      | No available                                                                      | 12        |
| Fe/N/C                       | 1.03                        | 0.82                            | 8.11                                                       | 3.97                     | 79% retention of j under 0.84 V for 11 h                                          | 13        |
| Fe/N/C                       | 0.92                        | 0.81                            | 4.68                                                       | 3.96                     | 30.4 mV penalty of E <sub>1/2</sub> after 10000 cycles                            | 14        |
| Fe/Fe <sub>2.5</sub> C/N/C   | 0.90                        | 0.72                            | 4.92                                                       | 3.85                     | 42 mV penalty of E <sub>1/2</sub> after 5000 cycles                               | 15        |
| Fe <sub>3</sub> C/N/CNT      | 0.96                        | 0.83                            | 5.21                                                       | 3.92                     | Negligible degradation of E <sub>onset</sub> and j <sub>L</sub> after 3000 cycles | 16        |

|                           |                        |                        |      |         |                                                  |    |
|---------------------------|------------------------|------------------------|------|---------|--------------------------------------------------|----|
| FexC/NGR                  | 0.98                   | 0.86                   | 3.74 | 3.87    | 30 mV penalty of E1/2 after 2000 cycles          | 17 |
| Fe-N/C                    | 0.98                   | 0.84                   | 4.81 | 3.97    | 93.3% retention of j under 0.70 V for 2.8 h      | 18 |
| N-Fe-co-doped carbonblack | 0.94                   | 0.82                   | 5.12 | 3.9     | 12 mV penalty of E1/2 after 3000 cycles          | 19 |
| PDMC-800                  | 0.94                   | 0.78                   | 3.5  | 3.78    | No available                                     | 20 |
| Fe3C/C-800                | 1.05                   | 0.83                   | 3.8  | unknown | 20 mV penalty of E1/2 after 4500 cycles          | 21 |
| (Fe,Co)@NGC               | 0.91                   | 0.85                   | 5.6  | 3.8     | 91 % retention of j for under 0.50 V for 5.6 h   | 22 |
| CNTs@Fe-N-C               | 0.98                   | 0.85                   | 5.35 | 3.95-4  | 18 mV penalty of E1/2 after 1000 cycles          | 23 |
| Fe-N-C                    | 0.99                   | 0.86                   | 6.8  | 3.96    | 4 mV penalty of E1/2 after 5000 cycles           | 24 |
| Fe-N-C/Vu                 | 0.93                   | 0.78                   | 5.70 | 3.9     | 2.5% penalty of Jlim after 5000 cycles at 0.75V  | 25 |
| Fe-N-C/KB                 | 0.92                   | 0.78                   | 5.54 | 3.8     | 17.9% penalty of Jlim after 5000 cycles at 0.75V | 25 |
| PANI-4.5Fe-HT2(SBA-15)    | 0.95                   | 0.84                   | 4.5  | 3.4-4.0 | 2 % retention of j under 0.57 V for 5.0 h        | 26 |
| Fe-N/C                    | 0.91                   | 0.81                   | 4.3  | 3.7-3.9 | 4 % retention of j under 0.7V for 2.8 h          | 27 |
| Co/N/C                    | 0.90                   | 0.77                   | 4.5  | 3.95    | 9 mV penalty of E1/2 after 10000 cycles          | 28 |
| Co/N/C                    | 0.84                   | 0.65                   |      | 3.8     | 90% retention of j for 2.8 h                     | 29 |
| Co/N/rGO                  | 0.83                   | 0.75                   | 3.16 | 3.97    | 80% retention of j under 0.66 V for 6 h          | 30 |
| GNC-Co                    | 55 mV negative to Pt/C | 15 mV negative to Pt/C | 4.0  | 3.78    | 11 mV penalty of E1/2 after 2000 cycles          | 20 |
| CoO@Co-N-C                | 0.94                   | 0.82                   | 5.7  | 4       | No available                                     | 31 |
| Co-N-C                    | 0.95                   | 0.81                   | 6.6  | 3.91    | No available                                     | 24 |

---

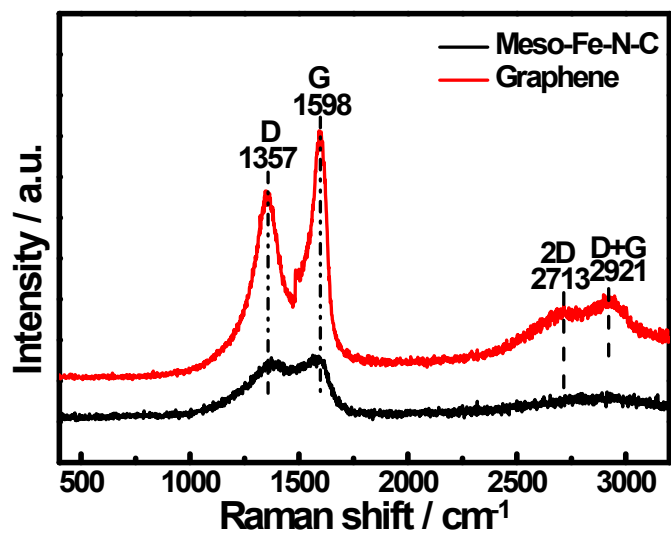

Figure S1. Raman spectra of graphene and meso-Fe-N-C nanocomposites.

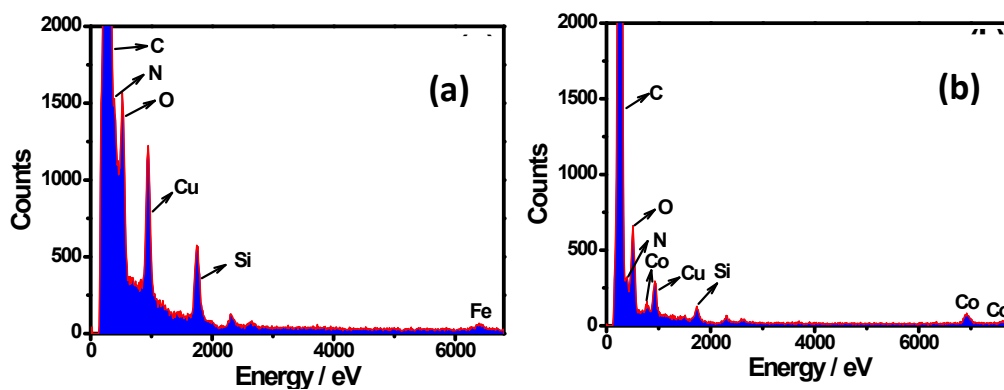

Figure S2. EDX spectra of (a) meso-Fe-N-C/N-G and (b) meso-Co-N-C/N-G.

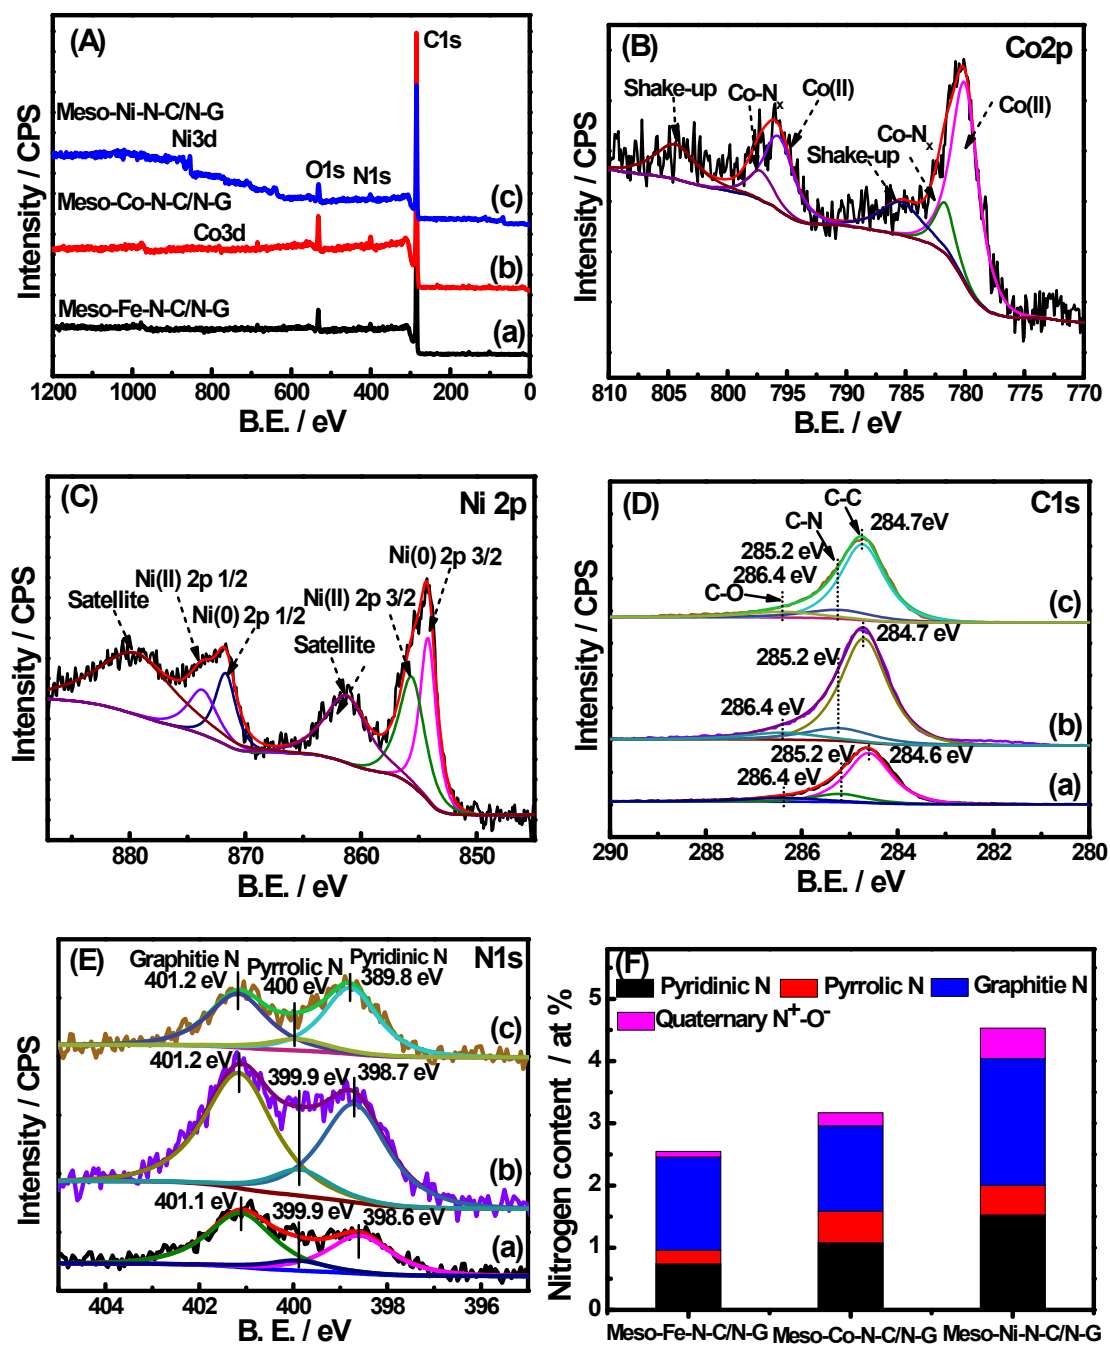

**Figure S3.** (A) XPS survey of meso-Fe-N-C/N-G, meso-Co-N-C/N-G and meso-Ni-N-C/N-G. High-resolution XPS spectra of (B) Co2p for meso-Co-N-C/N-G and (C) Ni2p for meso-Ni-N-C/N-G nanocomposites. High-resolution XPS spectra of (D) C1s and (E) N1s for (a) meso-Fe-N-C/N-G, (b) meso-Co-N-C/N-G, and (c) meso-Ni-N-C/N-G. (F) Concentration of N dopants in (a) meso-Fe-N-C/N-G, (b) meso-Co-N-C/N-G, and (c) meso-Ni-N-C/N-G nanocomposites.

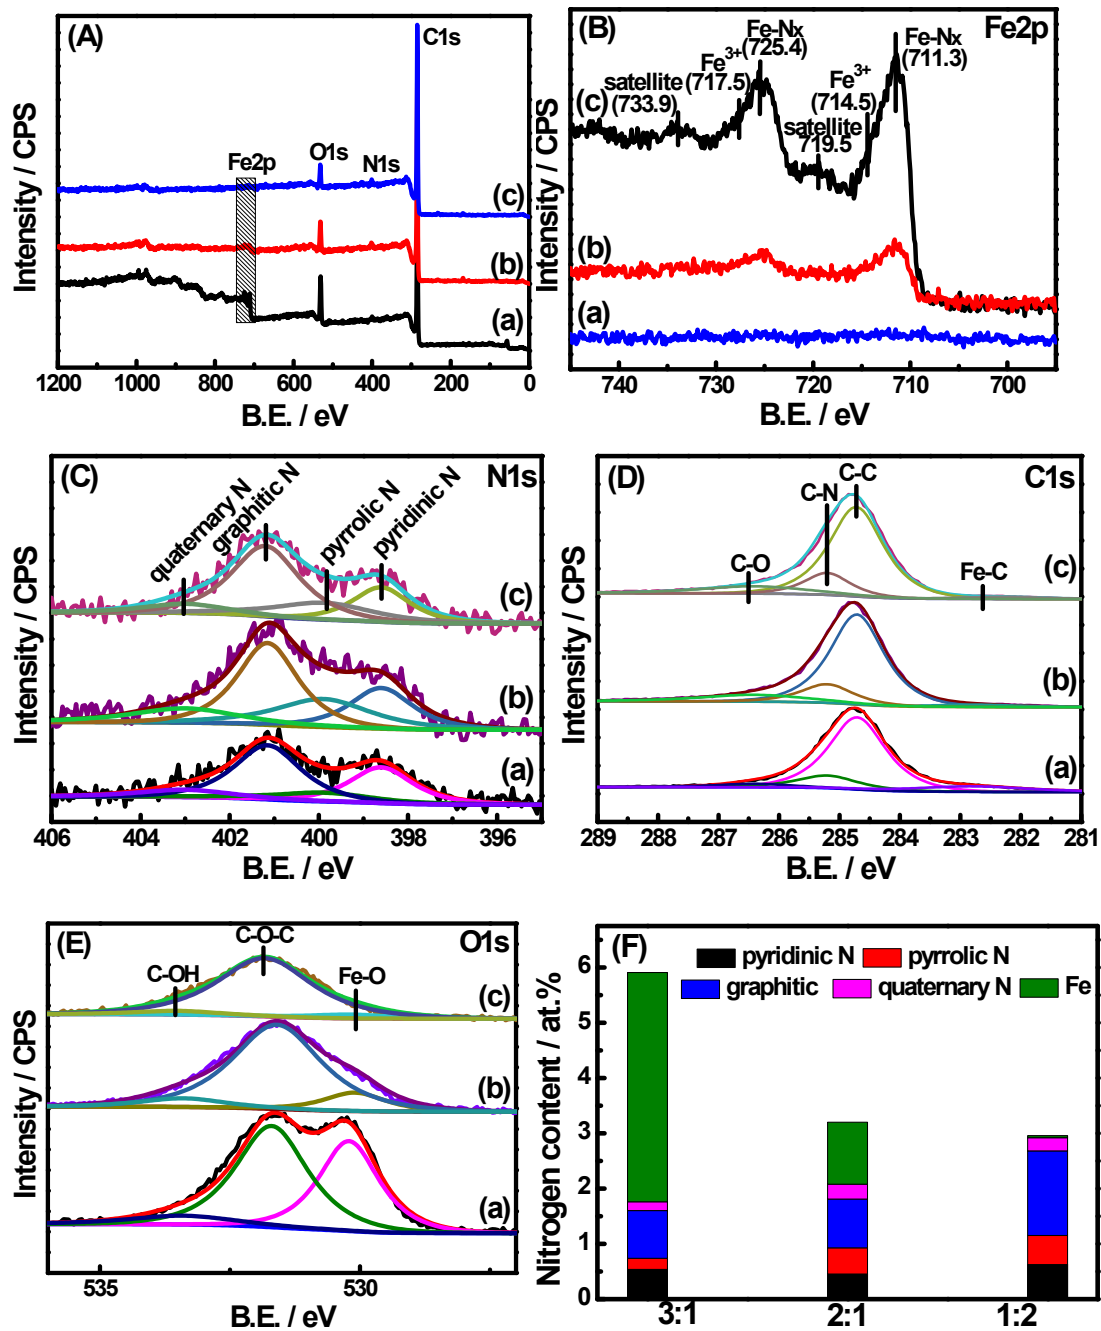

**Figure S4.** (A) XPS survey and high-resolution spectra of (B) Fe2p, (C) N1s, (D) C1s, and (E) O1s of (a) meso-Fe-N-C/N-G (Fe/N = 3:1), (b) meso-Fe-N-C/N-G (Fe/N = 2:1), and (c) meso-Fe-N-C/N-G (Fe/N = 1:2). (F) Concentration of N dopants in (a) meso-Fe-N-C/N-G (Fe/N = 3:1), (b) meso-Fe-N-C/N-G (Fe/N = 2:1), and (c) meso-Fe-N-C/N-G (Fe/N = 1:2).

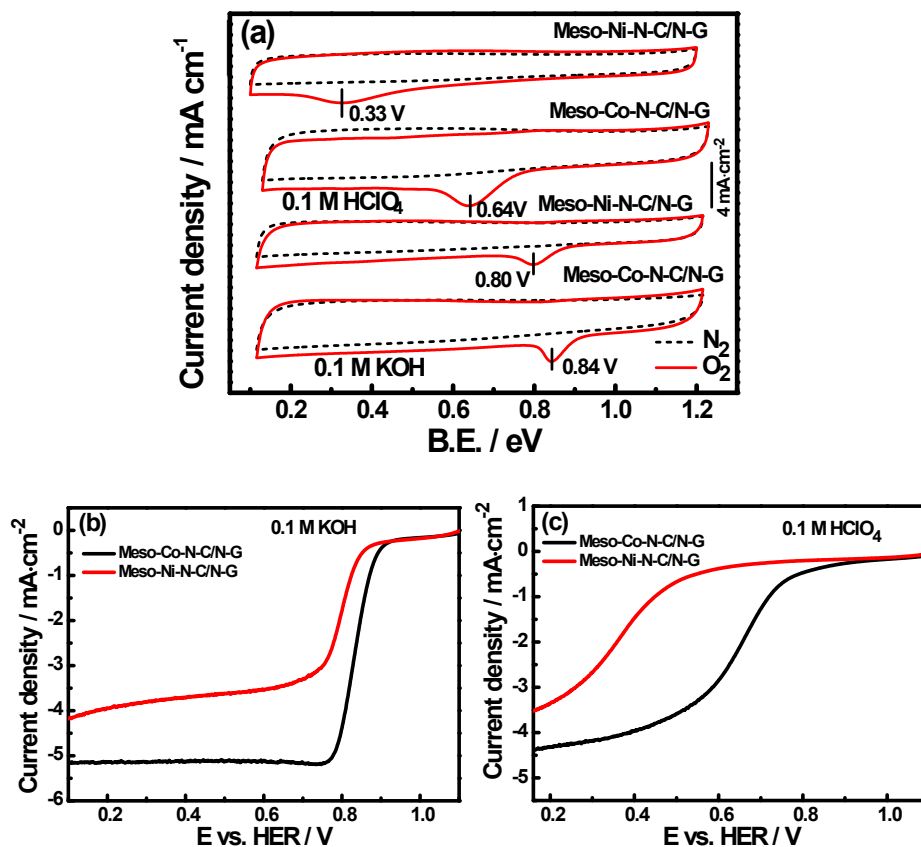

**Figure S5.** (a) Cyclic voltammograms of meso-Co-N-C/N-G and meso-Ni-N-C/N-G nanocomposites in  $N_2$ - and  $O_2$ -saturated 0.1 M KOH and 0.1  $HClO_4$  media at a scan rate of  $50 \text{ mV}\cdot\text{s}^{-1}$ . (b) LSV curves of meso-Co-N-C/N-G and meso-Ni-N-C/N-G at a rotation rate of 1600 rpm in  $O_2$ -saturated 0.1 M KOH medium at a scan speed of  $10 \text{ mV/s}$ . (c) LSV curves of meso-Co-N-C/N-G and meso-Ni-N-C/N-G nanocomposites at a rotation rate of 1600 rpm in  $O_2$ -saturated 0.1 M  $HClO_4$  medium at a scan speed of  $10 \text{ mV/s}$ .



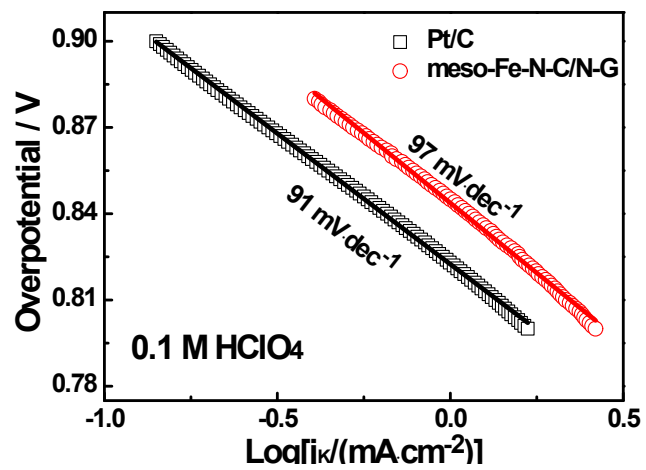

**Figure S6.** Tafel plots of Pt/C and Meso-Fe-N-C/N-C catalysts in O<sub>2</sub> saturated 0.1 M HClO<sub>4</sub> solution.

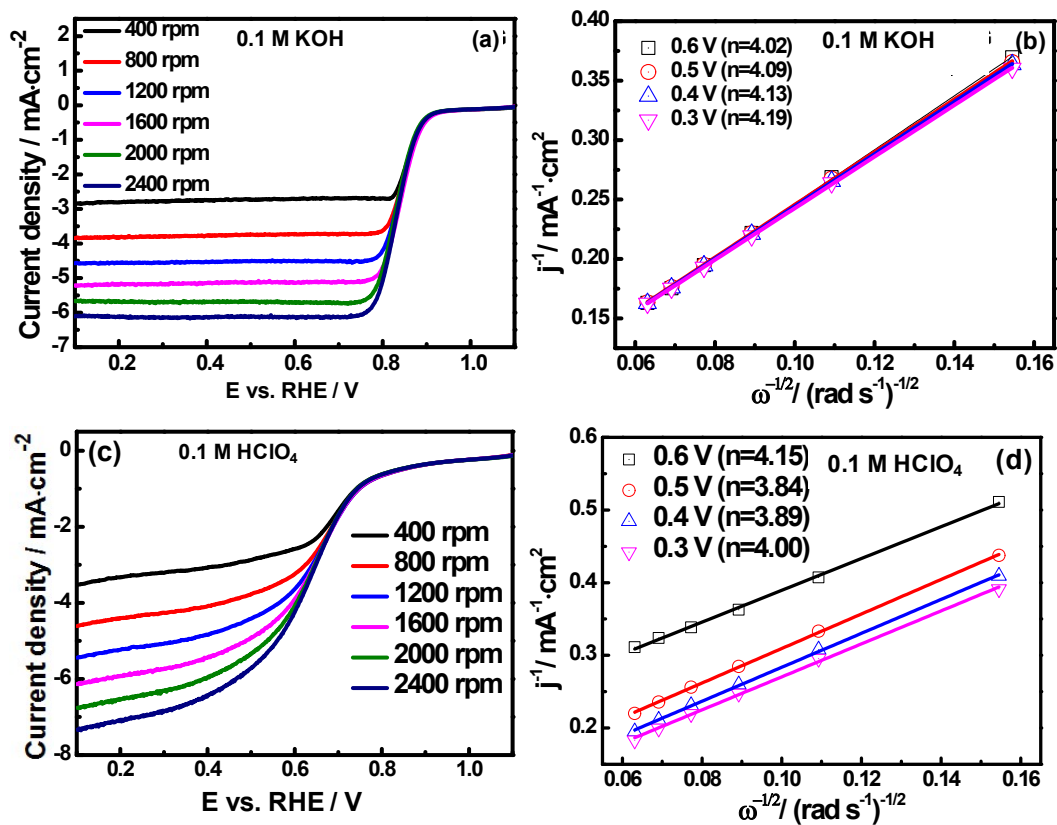

**Figure S7.** (a and c) LSV curves of meso-Co-N-C/N-G nanocomposites at the rotation rates of 400 to 2400 rpm in 0.1 M KOH and 0.1 M HClO<sub>4</sub> media. (b and d) The corresponding K-L plots at different potentials in 0.1 M KOH and 0.1 M HClO<sub>4</sub> media.

## Reference

1. S. Wang, M. Zhu, X. Bao, J. Wang, C. Chen, H. Li, Y. Wang, *ChemCatChem*, 2015, **7**, 2937.
2. K. Strickland, E. Miner, Q. Jia, U. Tylus, N. Ramaswamy, W. Liang, M. –T. Sougrati, F. Jaouen, S. Mukerjee, *Nat. Commun.*, 2016, DOI: 10.1038/ncomms8343.
3. W. –J. Jiang, L. Gu, L. Li, Y. Zhang, X. Zhang, L. –J. Zhang, J. –Q. Wang, J. S. Hu, Z. Wei, L. –J. Wan, *J. Am. Chem. Soc.*, 2016, **138**, 3570.
4. X. Cui, S. Yang, X. Yan, J. Leng, S. Shuang, P. M. Ajayan, Z. Zhang, *Adv. Funct. Mater.*, 2016, **26**, 5708.
5. K. Hu, L. Tao, D. Liu, J. Huo, S. Wang, *ACS Appl. Mater. Interfaces*, 2016, **8**, 19379.
6. C. Domínguez, F. J. Pérez-Alonso, M. A. Salam, S. A. Al-Thabaiti, M. A. F. Peñna, J. García-García, L. Barriola, S. Rojas, *Appl. Catal., B*, 2016, **183**, 185.
7. M. Yang, H. Chen, D. Yang, Y. Gao, H. Li, *J. Power Sources*, 2016, **307**, 152.
8. F. –L. Meng, Z. –L. Wang, H. –X. Zhong, J. Wang, J. –M. Yan, X. –B. Zhang, *Adv. Mater.*, 2016, **28**, 7948.
9. N. –H. Xie, X. –H. Yan, B. –Q. Xu, *ChemSusChem*, 2016, **9**, 2301.
10. J. Wei, Y. Liang, Y. Hu, B. Kong, G. P. Simon, J. Zhang, S. P. Jiang, H. Wang, *Angew. Chem., Int. Ed.*, 2016, **55**, 1355.
11. J. –S. Lee, G. S. Park, S. T. Kim, M. Liu, J. Cho, *Angew. Chem., Int. Ed.*, 2013, **52**, 1026.
12. P. Song, Y. W. Zhang, J. Pan, L. Zhuang, W. L. Xu, *Chem. Commun.*, 2015, **51**, 1972.
13. S. L. Zhao, H. J. Yin, L. Du, L. C. He, K. Zhao, L. Chang, G. P. Yin, H. J. Zhao, S. Q. Liu, Z. Y. Tang, *ACS Nano*, 2014, **8**, 12660.
14. L. Lin, Q. Zhu, A. W. Xu, *J. Am. Chem. Soc.*, 2014, **136**, 11027.

15. L. Z. Gu, L. H. Jiang, J. T. Jin, J. Liu, G. Q. Sun, *Carbon*, 2015, **82**, 57.
16. W. X. Yang, X. J. Liu, X. Y. Yue, J. B. Jia, S. J. Guo, *J. Am. Chem. Soc.*, 2015, **137**, 1436.
17. B. J. Kim, D. U. Lee, J. Wu, D. Higgins, A. P. Yu, Z. W. Chen, *J. Phys. Chem. C*, 2013, **117**, 26501.
18. W. Niu, L. Li, X. Liu, N. Wang, J. Liu, W. Zhou, Z. Tang, S. Chen, *J. Am. Chem. Soc.*, 2015, **137**, 5555.
19. J. Liu, X. J. Sun, P. Song, Y. W. Zhang, W. Xing, W. L. Xu, *Adv. Mater.*, 2013, **25**, 6879.
20. R. Silva, D. Voiry, M. Chhowalla, T. Asefa, *J. Am. Chem. Soc.*, 2013, **135**, 7823.
21. Y. Hu, J. O. Jensen, W. Zhang, L. N. Cleemann, W. Xing, N. J. Bjerrum, Q. F. Li, *Angew. Chem. Int., Ed.*, 2014, **53**, 3675.
22. J. Xi, Y. Xia, Y. Xu, J. Xiao, S. Wang, *Chem. Commun.*, 2015, **51**, 10479.
23. Y. Yao, H. Xiao, P. Wang, P. Su, Z. Shao, Q. Yang, *J. Mater. Chem. A*, 2014, **2**, 11768.
24. J. Sanetuntikul, S. Shanmugam, *Nanoscale*, 2015, **7**, 7644.
25. S. Bukola, B. Merzougui, A. Akinpelu, T. Laoui, M. N. Hedhili, G. M. Swain, M. Shao, *Electrochim. Acta*, 2014, **146**, 809.
26. X. -H. Yan, B. -Q. Xu, *J. Mater. Chem. A*, 2014, **2**, 8617.
27. Q. Cui, S. Chao, P. Wang, Z. H. Bai, K. Wang, L. Yang, *RSC Adv.*, 2014, **4**, 12168.
28. H. -W. Liang, W. Wei, Z. -S. Wu, X. Feng, K. Müllen, *J. Am. Chem. Soc.*, 2013, **135**, 16002.
29. H. Wang, X. Bo, A. Wang, L. Guo, *Electroche. Commun.*, 2013, **36**, 75.
30. B. Zheng, J. Wang, F. B. Wang, X. H. Xia, *J. Mater. Chem*, 2014, **2**, 9079.
31. D. Huang, Y. Luo, S. Li, B. Zhang, Y. Shen, M. Wang, *Nano. Res.* 2014, **7**, 1054.
